# Supplementary material for: Monodisperse, bimodal mesoporous ceria catalysts and adsorbents for air purification
Source: Royal Society of Chemistry journal article supplement (doi:10.1039/b618691b), 2007-01-01

**Supplementary Information:**

Pore size distribution analysis using mercury porosimetry for crystalline, monodisperse, pseudo-spherical, mesoporous ceria.

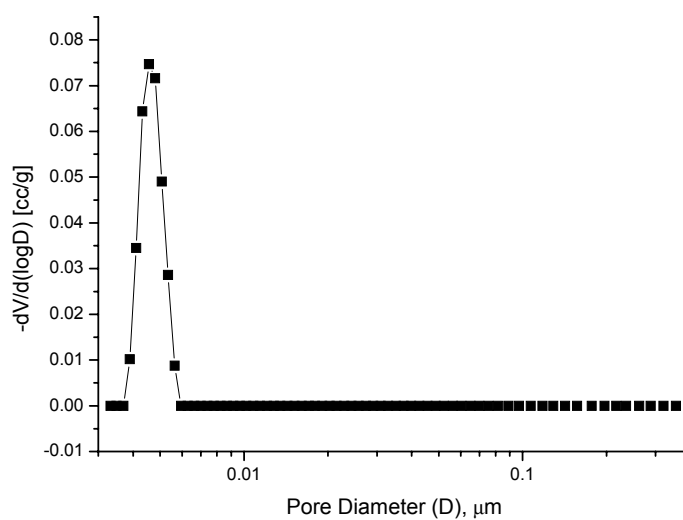

Supplement: b618691b.pdf [file b618691b.pdf]
